# Supplementary material
Source: PubMed Central journal article supplement (PMC7031737)
Supplement: mmc2.pdf [file mmc2.pdf]

# Effect of Osmolytes on Conformational Behavior of Intrinsically Disordered Protein $\alpha$ -Synuclein

Ishrat Jahan<sup>1</sup> and Shahid M. Nayeem<sup>1,\*</sup>

<sup>1</sup>Department of Chemistry, Aligarh Muslim University, Aligarh, Uttar Pradesh, India

**ABSTRACT**  $\alpha$ -Synuclein is an intrinsically disordered protein whose function in a healthy brain is poorly understood. It is genetically and neuropathologically linked to Parkinson's disease (PD). PD is manifested after the accumulation of plaques of  $\alpha$ -synuclein aggregates in the brain cells. Aggregates of  $\alpha$ -synuclein are very toxic and lead to the disruption of cellular homeostasis and neuronal death.  $\alpha$ -Synuclein can also contribute to disease propagation as it may exert noxious effects on neighboring cells. Understanding the mechanism of  $\alpha$ -synuclein aggregation will facilitate the problem of dealing with neurodegenerative diseases in general and that of PD in particular. Here, we have used molecular dynamics simulations to investigate the behavior of  $\alpha$ -synuclein at various temperatures and in different concentrations of urea and trimethyl amine oxide. The residue region from 61 to 95 of  $\alpha$ -synuclein is experimentally known as amyloidogenic. In our study, we have identified some other regions, which also have the propensity to form an aggregate besides this known sequence. Urea being a denaturant interacts more with these regions of  $\alpha$ -synuclein through hydrogen bond formation and inhibits the  $\beta$ -sheet formation, whereas trimethyl amine oxide itself does not interact much with the protein and stabilizes the protein by preferentially distributing water molecules on the surface of the protein.

**SIGNIFICANCE** The significance of this work lies, in particular, in understanding the pathophysiology of Parkinson's disease caused by  $\alpha$ -synuclein protein and, in general, in understanding the mechanism of protein aggregation in the presence of osmolytes.

## INTRODUCTION

$\alpha$ -Synuclein is a small (14 kDa) intrinsically disordered protein. It is a highly conserved presynaptic protein that is generously found in various regions of the brain (1–3) and is closely associated with Parkinson's disease (PD). PD arises because of abnormal aggregation of  $\alpha$ -synuclein, and these aggregates are dominantly found in Lewy bodies as the hallmark of PD (4) and other synucleinopathies, such as multiple system atrophy and dementia with Lewy bodies. Patients diagnosed with Alzheimer's disease have  $\alpha$ -synuclein and coaggregates with amyloid- $\beta$  ( $A\beta$ ) in the brain tissue (5). In vitro,  $\alpha$ -synuclein form fibrils that have characteristics and morphologies similar to those obtained from a disease-affected brain (6–11). Patients with PD essentially have aggregates of  $\alpha$ -synuclein, which suggests a central role of this protein in a sporadic disorder. However,

the normal function of  $\alpha$ -synuclein remains poorly understood (12). Proteins are biologically active in their three-dimensional structures, and their biological activity is questioned because of the presence of a natively unfolded structure.

Human  $\alpha$ -synuclein protein has 140 amino acid residues and consists of three distinct regions, which includes an amphipathic N-terminal domain (residue 1–60), a central hydrophobic region, the non- $A\beta$  component (residue 61–95), and a highly acidic C-terminal domain (residue 96–140). Monomeric form of  $\alpha$ -synuclein is responsible for the formation of aggregates (mainly the non- $A\beta$  component region, which accumulates at a high level in plaques) (12) and play an important role in PD pathogenesis; therefore, the structural analysis of monomeric form of  $\alpha$ -synuclein has become very crucial to understand the conformational changes taking place during aggregate formation.

Proteins are marginally stable, and the stability of the protein can easily be altered by changing the thermodynamic environment of the protein or by the addition of small molecules, such as cosolvent or crowding agents (13) and

Submitted May 16, 2019, and accepted for publication September 30, 2019.

\*Correspondence: [msnayeem.ch@amu.ac.in](mailto:msnayeem.ch@amu.ac.in)

Editor: Markus Buehler.

<https://doi.org/10.1016/j.bpj.2019.09.046>

© 2019 Biophysical Society.

osmolytes (14). Osmolytes are naturally occurring compounds, which may either cause a protein unfolding (termed as denaturant mainly urea) or may result in protein folding into stable native conformations, which, in this case, is an intrinsically disordered conformation of  $\alpha$ -synuclein (protectants that include trimethylamine N-oxide) (15). Urea is a small organic compound responsible for the denaturation of the protein (16), and TMAO is a small molecule responsible for the stabilization of the protein (17). Various studies have been performed to explore the effect of two contrasting osmolytes urea and TMAO on the conformations of peptides. Standard molecular dynamics (MD) simulation of deca-alanine peptide has been performed by Kokubo et al. (18) to investigate the nature of denaturing osmolyte urea and protecting osmolyte TMAO. Their result shows different behavior in two osmolytes due to the van der Waals and electrostatic interactions. Mondal et al. (19) also performed a MD simulation on a 32-bead polymer chain in the presence of 7 M urea and 1 M TMAO and found that both osmolytes affect the conformations of the polymer chain in a significantly different manner. Their results showed that urea leads to the formation of an extended conformation, and TMAO suppressed the extended conformation of the polymer chain. MD simulation studies have been widely performed on an intrinsically disordered protein, such as A $\beta$  protein, human amylin, tau protein,  $\alpha$ -synuclein, etc. The effect of urea and TMAO on the conformation of tau protein has also been explored earlier (20), which resulted in a population shift in the monomeric form.

Although numerous studies are reported exploring the conformational behavior of proteins in the presence of osmolytes, further investigations are required to explore the mechanistic insights of osmolyte-induced protein compaction and unfolding. Many experimental studies reported earlier show that conformational changes in the monomeric form of  $\alpha$ -synuclein induces/sets off fibrillar aggregate formation, which is responsible for PD (4,21); therefore, understanding the conformations of the monomeric form of  $\alpha$ -synuclein in the presence of osmolytes becomes essential.

In this study, we have explored the thermal effect and the effect of urea and TMAO in regulating the conformational properties of the monomeric form of  $\alpha$ -synuclein, which is

intrinsically disordered. Standard MD simulations of 1.8  $\mu$ s have been performed in explicit water and osmolytes. Remarkable differences have been observed on the  $\alpha$ -synuclein conformation by changing temperature, denaturant urea, and protectant TMAO. An increase in temperature leads to the formation of more  $\beta$ -sheets, and urea enhances the formation of extended structure, whereas TMAO results in the formation of compact conformations.

## METHODS

The crystal structure of intrinsically disordered protein  $\alpha$ -synuclein was taken from RCSB Protein Data Bank with PDB: 1XQ8. GROMACS 5.1.4 (22) software package was used to perform the simulations with GROMOS96 53a6 force field. The protein was placed in a triclinic box of length  $7 \times 17 \times 6$  nm<sup>3</sup>, which was filled with single-point charge water model (23), and periodic boundary conditions were used. MD simulations of the protein were performed at three different temperatures, 300, 350 and 400 K, in the presence of water only and at 300 K in the presence of urea and trimethyl amine oxide (TMAO) at various concentrations. An osmolytes box was built before these simulations and equilibrated using the method as described by Rocco et al. (24). The topology for urea and TMAO was built from Automated Topology Builder (ATB) (25). The parameters generated from ATB are found to be reliable and is extensively used in a number of current studies (26–31). However, to justify the effectiveness of ATB parameters, we have calculated the thermodynamic property (i.e., density), transport property (self-diffusion coefficient), and structural property (RDF and number of hydrogen bonds) of a 3 M TMAO box and compared our result with the shea force field and united atom force field (generated from ATB) of TMAO as a benchmark test (32), which is provided in the [Supporting Materials and Methods](#). Sodium ions were added to neutralize the system. A similar simulation protocol was used as reported earlier (33). A total of nine standard MD simulations were performed with each at a timescale of 200 ns and a total simulation time of 1.8  $\mu$ s (Table 1). All the systems were simulated under isothermal-isobaric ensemble (NPT; constant number of atoms, pressure, and temperature).

After MD simulations, the last 90 ns of the trajectory was analyzed, discarding the initial 110 ns after the convergence analysis of the trajectories (Fig. S1; Table S1). The overall dynamics of the protein was determined through principal component analysis (PCA), which gives the significant motion of protein. To analyze the stability of the protein at various temperatures and in the presence of osmolytes, the RMSD of the backbone atoms with respect to the initial structures were investigated using `gmx rmsdist` command. Hydrogen bonds were calculated with a cutoff of 2.5 Å using `gmx hbond`, distribution of water and osmolytes around protein were calculated using `gmx rdf` (radial distribution function (RDFs)) command, residue level conformational changes in the protein was carried out using `gmx rmsf` (root mean-square fluctuation) command, and the interaction energy

**TABLE 1** Parameters Used for the MD Simulations of  $\alpha$ -Synuclein in Water and Osmolytes

| S. Number | Temperature (K) | Osmolytes (M) | Number of Osmolytes | Number of Water Molecules | MD Time (ns) |
|-----------|-----------------|---------------|---------------------|---------------------------|--------------|
| 1         | 300             | –             | –                   | 19,396                    | 200          |
| 2         | 350             | –             | –                   | 19,396                    | 200          |
| 3         | 400             | –             | –                   | 19,396                    | 200          |
| 4         | 300             | Urea 3 M      | 686                 | 10,118                    | 200          |
| 5         | 300             | Urea 5 M      | 1249                | 10,032                    | 200          |
| 6         | 300             | Urea 8 M      | 1934                | 7952                      | 200          |
| 7         | 300             | TMAO 3 M      | 780                 | 12,274                    | 200          |
| 8         | 300             | TMAO 5 M      | 912                 | 11,395                    | 200          |
| 9         | 300             | TMAO 8 M      | 1040                | 10,899                    | 200          |

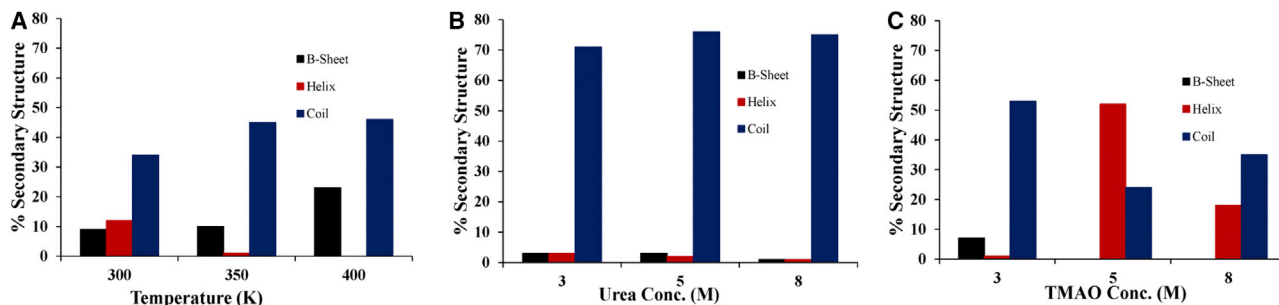

FIGURE 1 Average secondary structure content of  $\alpha$ -synuclein during the last 90 ns of the MD simulation (A) at 300, 350, and 400 K, (B) at 300 K in urea (3, 5, and 8 M), and (C) at 300 K in TMAO (3, 5, and 8 M). To see this figure in color, go online.

between osmolytes and protein was calculated using gmx energy command. The percentage of  $\alpha$ -helical and  $\beta$ -sheet contents of protein was determined using DSSP program (34). Native contacts were calculated between all the  $C\alpha$  atoms of the protein using VMD (35) software.

There are two main sources of errors/limitations in standard MD simulations, sampling time due to limited computational resources and approximations in the force field. We have established the convergence of trajectories based on the number of cluster and cluster entropy calculation, which clearly shows that the time of sampling is sufficient to give an equilibrated trajectory. Based on convergence criteria, we discarded the initial unequilibrated trajectory and analyzed the latter part of the trajectory to get an equilibrated ensemble of conformations. As far as the second bias of force field is concerned, although the GROMOS force field used is more biased toward  $\beta$ -sheet, in this case, we have shown that the content of the secondary structure as well as other physical parameters are within the variable limit of different experimental observations. This makes our result robust and convincing.

### Principal component analysis

Intrinsic properties of macromolecules can be determined by its correlated motion. Proteins are complex in nature, and though the conformational space available to the protein is decided by the large number of degree of freedom, extracting the dynamics of the protein from these large conformational spaces is difficult. Hence, the dominant motions that are basically involved in the function can be characterized by a small number of degrees of freedom or principal components (36). PCA is one of the methods that are capable of extracting the principal modes of motion by diagonalizing the  $3N \times 3N$  ( $N$  is the number of  $C\alpha$ , C, N, and O atoms) covariance matrix of Cartesian displacements. PCA analysis can provide a brief picture of the motions of macromolecules by applying the dimensionality reduction method (36,37). PCA is based on the calculation and diagonalization of the covariance matrix. Covariance matrix  $C$  is calculated as follows:

$$C = \langle (x(t) - \langle x \rangle)(x(t) - \langle x \rangle)^T \rangle, \quad (1)$$

where,  $x(t)$  shows the coordinates at time “ $t$ ,”  $\langle x \rangle$  indicates the average position, and  $\langle \rangle$  indicates the ensemble average.

The covariance matrix “ $C$ ” is then diagonalized to obtain eigenvalues and eigenvectors, as follows:

$$C = T D T^T, \quad (2)$$

where  $D$  is the diagonalized matrix of eigenvalues, and  $T$  contains the eigenvectors.

Along with PCA, free energy landscape (FEL) plots were also established by calculating the normalized probability distribution based on the set of ordered parameters. The free energy can be defined based

on the probability distribution ( $P$ ) by using the following relation:  $F = -RT \ln P$ . The reaction coordinates used here are native contacts ( $N_c$ ) and RMSD.

### Preferential interaction coefficient

The chemical potential of the protein system, generally protein equilibria and reaction kinetics, can be perturbed by the addition of cosolvent to the aqueous protein solution. Cosolvent can interact more strongly or more weakly with the protein than water and thus alters the protein chemical potential. This phenomenon is called “preferential binding” (38), and it governs the physical and chemical properties of the protein.

The cosolvent interactions with the protein can be evaluated by measuring the preferential interaction coefficient and is defined as follows:

$$\Gamma_{XP} = - \left( \frac{\partial \mu_P}{\partial \mu_X} \right)_{m_P, T, P} = \left( \frac{\partial m_X}{\partial m_P} \right)_{\mu_X, T, P}, \quad (3)$$

where  $\mu$  and  $m$  denotes the chemical potential and concentration, respectively, and the subscripts  $X$  and  $P$  indicates the cosolvent and the protein, respectively (39).

The thermodynamic way of defining the interaction of cosolvent with the protein is preferential interaction coefficient. The preferential interaction coefficient is defined as the measure of the excess number of cosolvent molecules in the local domain of the protein per protein molecule. Statistical mechanics provide the relationship between thermodynamic definition and spontaneous approach of binding (i.e., excess number of water or osmolyte molecules in the local domain) (40,41), and it can be calculated as follows:

$$\Gamma_{XP} = \left\langle N_X^{local} - \left( \frac{N_X^{bulk}}{N_W^{bulk}} \right) N_W^{local} \right\rangle, \quad (4)$$

where  $N$  indicates the number of the specific type of molecule ( $X$  denotes cosolvent, and  $W$  denotes water) in a particular domain, and the angle bracket shows average ensemble. If the value of  $\Gamma_{XP}$  is greater than zero, then the cosolvent molecule accumulating in the vicinity of the protein is observed showing a net favorable interaction. A denaturant like urea exhibits this type of binding behavior. Conversely, if the value of  $\Gamma_{XP}$  is smaller than zero, it shows net unfavorable interactions with the protein surface because of the exclusion of cosolvent from the local domain of the protein (42). Such type of behavior is exhibited by protecting osmolytes like TMAO. Eq. 4 is used for calculating the preferential interaction coefficient directly from all atom MD simulations (43). The preferential interaction coefficient ( $\Gamma_{XP}$ ) was calculated as the function of distance from the surface of the protein, and the appropriate cutoff based on RDF was applied.

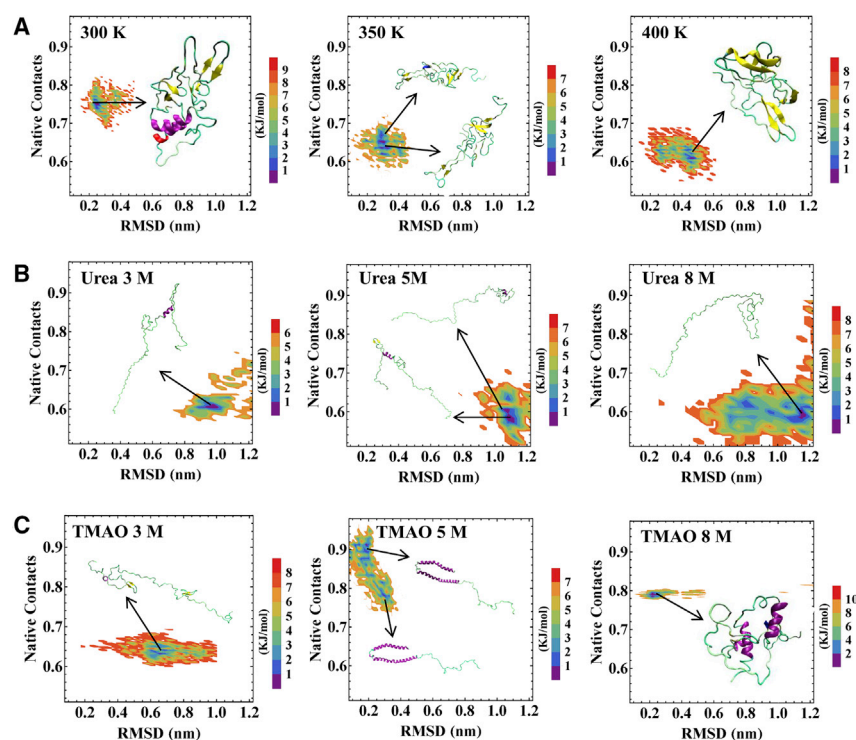

FIGURE 2 FEL plot of  $\alpha$ -synuclein as a function of native contacts and RMSD of C $\alpha$  atoms of  $\alpha$ -synuclein at (A) 300, 350, and 400 K in the absence of osmolyte, (B) 300 K in the presence of urea 3, 5, and 8 M, and (C) 300 K in the presence of TMAO 3, 5, and 8 M. To see this figure in color, go online.

### Diffusion coefficient

Diffusion coefficient for water and osmolyte (urea and TMAO) molecules were calculated to see the extent of translational mobility under different conditions using the Einstein equation:

$$D_w = \lim_{t \rightarrow \infty} \langle |r(t) - r(0)|^2 \rangle / 6t, \quad (5)$$

where  $r(t)$  and  $r(0)$  represent the position vectors of the center of mass of molecules at time  $t$  and 0. We have taken the average for every molecule after every 10 ps as the time origin. The diffusion coefficients were calculated from the slope of the mean-square displacements versus time plot using the above equation.

### Interaction energy between protein and osmolyte

The Coulombic and Lennard-Jones contributions to the total protein-urea and protein-TMAO interaction energy at various concentrations were calculated using the gmx energy command of GROMACS utility.

### Tetrahedral order parameter

Oriental tetrahedral order parameter is the most widely used ordered parameter to investigate the structural ordering among the nearby water molecules, and it is defined as follows (44):

$$q = 1 - \frac{3}{8} \sum_{i=1}^3 \sum_{j=i+1}^4 \left( \cos \theta_{ij} + \frac{1}{3} \right)^2, \quad (6)$$

where  $\theta_{ij}$  is the angle subtended by the central oxygen atom of water with its  $i_{th}$  and  $j_{th}$  neighbors. The tetrahedral order parameter measures the extent of the tetrahedral arrangement of central water molecules with its four

neighbors. “ $q$ ” is the mean value and is averaged over a large number of molecular configurations. For a perfect tetrahedral crystal, the value of  $q$  is 1 and is 0 for the system with a random distribution of angles (ideal gas limit) (45).

## RESULTS AND DISCUSSION

The conformational properties in two contrasting osmolytes and water show significantly differing behavior. In the crystal structure,  $\alpha$ -synuclein contains 59% of  $\alpha$ -helical, 19% random coil, and 0%  $\beta$ -sheet content. The change in the secondary structural conformation of the protein was obtained using the DSSP program. The percentages of secondary structure content of  $\alpha$ -synuclein at different temperatures in water and in different concentrations of urea (3, 5, and 8 M) and TMAO (3, 5, and 8 M) at 300 K are shown in Fig. 1.

In the absence of osmolytes, the formation of the  $\beta$ -sheet takes place at the expense of the  $\alpha$ -helical content and increases with increase in temperature (Fig. 1 A). These results indicate that the aggregation propensity of  $\alpha$ -synuclein increases with an increase in temperature. This could be because the hydrophobicity of  $\alpha$ -synuclein is expected to increase with an increase in temperature, as reported earlier (46). However, another study shows a decrease in fibrillation with an increase in temperature (47). At 300 K, the overall  $\alpha$ -helix, coil, and  $\beta$ -sheet content at the end of the protein simulation in water as shown in Fig. 1 A are 12, 38, and 9%, respectively. The corresponding experimental values are within the range of 10–40%, 17–41%, and 0–20%,

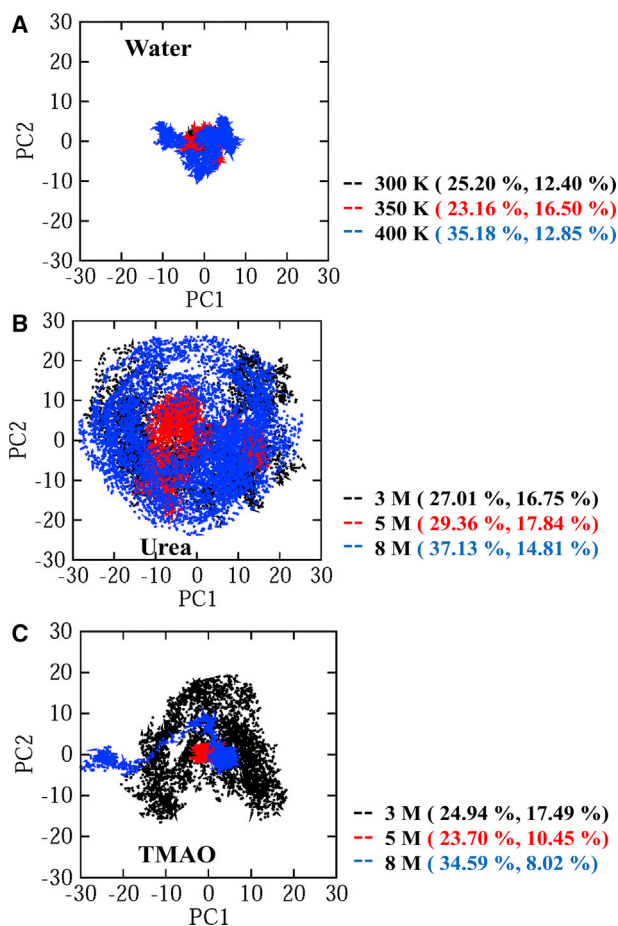

FIGURE 3 Projection of the structure of  $C\alpha$  atoms of  $\alpha$ -synuclein in MD trajectories onto the first two eigenvectors PC1 and PC2, along with their percentage of contribution in (A) water, (B) urea, and (C) TMAO. To see this figure in color, go online.

respectively, depending upon the measurement conditions and techniques employed (48–55). Thus, the simulation results are qualitatively consistent and quantitatively within range with the experimental results.

In the presence of urea, the formation of  $\beta$ -sheet content is relatively low in comparison with water and decreases with an increase in concentration; this shows the decreased tendency of  $\alpha$ -synuclein to form aggregates in the presence of urea (Fig. 1 B). As TMAO is known as a protein-stabilizing osmolyte, the percentage of helical content goes on increasing with an increase in concentration, but this increase is higher at a moderate concentration. At 5 M TMAO concentration, 88% of the  $\alpha$ -synuclein remains in its native state (i.e., initially disordered state even after a 200-ns MD simulation) (Fig. 1 C). This observation indicates that TMAO can stabilize the  $\alpha$ -synuclein at a moderate concentration.

Additionally, we have also examined the effect of osmolytes (urea 5 M and TMAO 5 M) at higher temperatures, 350 and 400 K, and observed that urea, which inhibits the formation of  $\beta$ -sheets at 300 K, will no longer remain as a  $\beta$ -sheet

inhibitor; rather, more  $\beta$ -sheets are formed at a higher temperature in the presence of 5 M urea. However, at 5 M TMAO, the condition is totally reversed;  $\alpha$ -synuclein, which was in its initial conformation at 300 K, loses  $\alpha$ -helical content at a higher temperature (Table S2). These observations clearly indicate a more pronounced influence of temperature on the protein conformation.

## FEL

The FEL may provide information about the pathway of the protein folding and unfolding (56–58). The two-dimensional FEL profile of  $C\alpha$  root mean-square deviation (RMSD) and number of native contacts show remarkable changes in the protein conformations at different temperatures in the absence of osmolytes and at various concentrations in the presence of osmolytes at 300 K (Fig. 2).  $\alpha$ -Synuclein in water forms a  $\beta$ -sheet conformation with an increase in temperature characterized by wider energy basins having a lower value of native contact ( $N_c \sim 0.60$ – $0.78$ ) and lower RMSD (0.20–0.44 nm) at various temperatures (Fig. 2 A). However,  $\alpha$ -synuclein in urea shows heterogeneity in sampled conformations characterized by wider basins in which  $\alpha$ -synuclein explored a number of intermediates with an energy barrier of 1.0–2.0 kJ/mol (Fig. 2 B). The unfolding of  $\alpha$ -synuclein is observed, and it adopts an extended conformation with a lesser number of native contacts ( $N_c \sim 0.60$ – $0.56$ ) and higher RMSD (0.80–1.20 nm), consistent with the unfolding of  $\alpha$ -synuclein with an increase in urea concentration (Fig. 2 B). However,  $\alpha$ -synuclein in TMAO is represented by smaller basins with energy minima shifted slightly to a lower RMSD value and higher native contacts indicating the stabilization of  $\alpha$ -synuclein with an increase in TMAO concentration, but this stabilization is higher at 5 M TMAO because at this concentration,  $\alpha$ -synuclein resembles the native conformation with 90% of the native contact of the protein. At 3 M TMAO, extended conformations were adopted by the protein with a higher fluctuation from their initial conformation as indicated by a large RMSD and small native contact value. A higher RMSD value may be assigned because of a larger fluctuation of the coil conformation at a lower TMAO concentration, whereas a higher native contact value could be assigned to the gain of the native-like conformation of the secondary structure at a higher TMAO concentration. The structure corresponding to the energy minima of the FEL plot is shown in the respective inset (Fig. 2). Experimental analysis was also carried out by Ferreón et al. on monomeric  $\alpha$ -synuclein in the presence of urea and TMAO; it was observed that TMAO counteracts the effect of urea, and with an increase in TMAO concentration, more compact conformations were formed (59). Our results also indicate that with an increase in TMAO concentration, a more compact conformation was adopted by the protein, which is in agreement with the experimental results. Hence, the

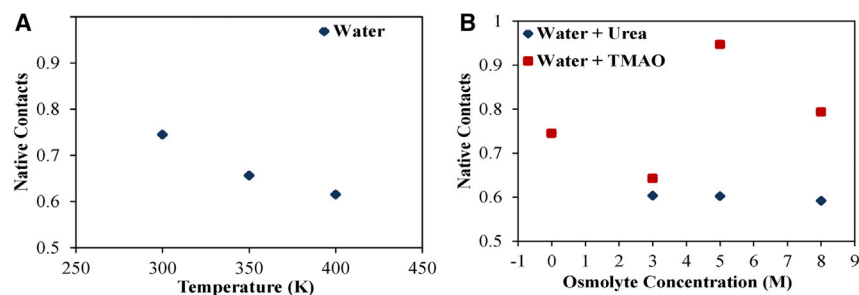

FIGURE 4 A fraction of native contacts of C $\alpha$  atoms of  $\alpha$ -synuclein as a function of (A) the temperature (in the absence of osmolytes) and (B) the osmolytes concentration (urea and TMAO). To see this figure in color, go online.

stabilizing nature of TMAO is concentration dependent, and it can retain the initial conformation of  $\alpha$ -synuclein at 5 M TMAO concentration, which is in agreement with the DSSP result (Fig. 1 C).

### PCA

Principal modes of motion of  $\alpha$ -synuclein in osmolytes and in water at different temperatures can be determined through PCA analysis of the MD trajectory data. Fig. 3 shows the projection of the structures of the C $\alpha$  atoms of  $\alpha$ -synuclein in the MD trajectory onto the first two eigenvectors defined by PC1 and PC2, which allows for visualizing the different conformational spaces projected during the MD simulations. Each point in Fig. 3 represents one conformation of  $\alpha$ -synuclein that is attained during the MD simulation, and the density of points indicates the population of the conformations sampled during the MD run. It is observed from the results that  $\alpha$ -synuclein in water has well-defined clusters as compared to  $\alpha$ -synuclein in urea and TMAO.  $\alpha$ -Synuclein in urea covered a large region of the conformational space along the PC1 and PC2 than in water (Fig. 3, A and B). This difference in the concerted motion of  $\alpha$ -synuclein could be because of the fluctuation of the coil as the formation of the extended structure takes place in urea with increasing urea concentration (Fig. 2 B) than in water as more  $\beta$ -sheets are formed with an increase in temperature (Fig. 2 A). However, the motion of  $\alpha$ -synuclein in the presence of TMAO shows nonuniform behavior. At 3 M TMAO,  $\alpha$ -synuclein explored a large conformational space along PC1 and PC2, which is different from water solvent simulation at 300 K (Fig. 3, A and C). With a further increase in TMAO concentration, the  $\alpha$ -synuclein explored more confined ranges of PC1 and PC2 as the formation of a more compact conformation is observed (Fig. 2 C). At a moderate concentration of TMAO, the  $\alpha$ -synuclein explores a very small region of PC1 and PC2 because at this concentration, it remains almost in its initial conformation (Fig. 2 C). TMAO being a stabilizing osmolyte is expected to resist changes in the native state with an increasing concentration; however, we observed a 5 M TMAO concentration to be a better protectant of native structure than 8 M, in which 88% of native

structure is retained (Fig. 1). These results suggest that  $\alpha$ -synuclein occupies comparatively less space in the phase space at 5 M TMAO than at any other concentration, which shows that TMAO stabilizes the protein in a concentration-dependent manner. This result is also in agreement with the FEL results (Fig. 2 C).

Further insights on the conformational dynamics of  $\alpha$ -synuclein were obtained using different analytical utility options of GROMACS. In PCA and FEL, only two reaction coordinates are used that alone are not sufficient to justify the extent of the aggregation propensity of the protein. One needs to examine various other properties, which could provide significant information differentiating native and non-native conformations of proteins.

In this context, to validate our previous results, we have calculated various properties, number of native contacts and number of water and osmolyte molecules within the first hydration shell of the protein to see the hydration property, number of hydrogen bonds formed between the protein side chain with water molecules and osmolytes, the interaction energy of the protein and osmolytes, preferential interaction coefficient, and the average tetrahedral order parameter of water molecule.

We have monitored the retention of the native conformation of  $\alpha$ -synuclein in terms of native contacts. Native contact is defined when two C $\alpha$  atoms are within 0.7 nm to each other in the conformation of interest as well as in the native state (60). The average value of the fraction of the native contact as a function of temperature and osmolytes (urea and TMAO) concentration between C $\alpha$  atoms of  $\alpha$ -synuclein has been calculated in the presence and absence of osmolytes for the last 90 ns of the trajectory (Fig. 4; Table S3). The average fraction of the native contact in the absence of osmolytes decreases with an increase in temperature during the last 90 ns of the simulation time. In the presence of urea, the fraction of native contact decreases with an increase in urea concentration, which indicates a significant departure from the native state and, hence, results in an extended conformation of the protein. Because at 3 M urea,  $\alpha$ -synuclein adopts an  $\sim$ 80% extended conformation, with a further increase in concentration, no major shift in native contact value is observed. The loss of native contact in the case of TMAO is less as compared to urea, and this

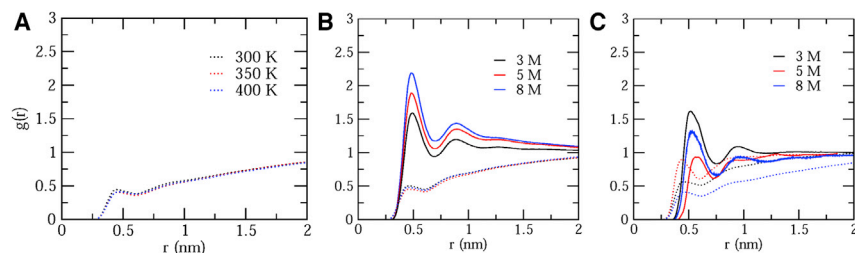

FIGURE 5 RDFs of (A) water molecules at different temperatures and (B) urea and water molecules and (C) TMAO and water molecules at different concentrations from the surface of the protein (*solid line* corresponds to osmolytes, and *dotted lines* correspond to water, respectively). To see this figure in color, go online.

loss shows a nonmonotonous behavior with over 90% of the native contact being retained at 5 M TMAO. As expected at 5 M TMAO concentration, the protein conformation resembles the native conformation.

The interaction of the urea and TMAO molecules with  $\alpha$ -synuclein requires the calculation of RDFs of water and osmolyte molecules around the  $\alpha$ -synuclein. The comparison between RDFs of the urea and TMAO molecules at various concentrations is shown in Fig. 5. The RDFs are calculated from the surface of the protein. The peaks in RDFs are located at the shortest distance from the protein surface, and it indicates the closest interaction of osmolytes and water with the protein. RDFs of water molecules do not show any significant changes at different temperatures and at different concentrations of urea in protein-water and protein-urea simulations, respectively (Fig. 5, A and B). However, in TMAO, RDFs of water molecules shows nonuniform changes as TMAO interact with the protein in nonmonotonic fashion (Fig. 5 C). A small peak in the case of TMAO signifies exclusion of TMAO molecules from the local domain of the protein in comparison with the urea. As seen from Fig. 5 B, it contains two distinct peaks up to 1 nm distant of the protein surface. The first peak around 0.5 nm indicates that more urea molecules are present around the protein and is found to be increasing gradually with an increase in urea concentrations (Fig. 5 B). However, in the case of TMAO, similar to native contacts, RDFs too show a non-monotonic decrease with a maximal decrease at a 5-M concentration (Fig. 5 C). This suggests that in comparison with urea, the TMAO molecule moves away from the first hydration layer of the  $\alpha$ -synuclein. This result indicates that the preferential solvation of  $\alpha$ -synuclein is by urea molecules than by TMAO.

### Preferential interaction coefficient

The preferential solvation of  $\alpha$ -synuclein in the presence of urea and TMAO can be further studied by the calculation of the preferential interaction coefficient. We plot the preferential interaction coefficient of the urea and TMAO with the protein as a function of the distance “r” from the surface of the protein (i.e., local domain) in urea and TMAO solutions with increasing urea and TMAO concentrations (Fig. 6; (61)).

The preferential solvation of the protein with urea has been observed with an increase in concentration of urea, signifying the accumulation of urea in the local domain of the protein. We observed that the preferential interaction includes direct and indirect solvent-mediated interactions between  $\alpha$ -synuclein and solvent molecules (urea, TMAO, and water). In contrast, a decrease in protein-TMAO preferential interaction has been observed with an increase in TMAO concentration, which shows the exclusion of TMAO molecules from the local domain of the protein surface, hence reducing the protein-TMAO preferential interaction. The decrease in the value of the preferential interaction coefficient is larger at 5 M TMAO concentration, which is also in agreement with the above results.

### Hydration behavior of $\alpha$ -synuclein containing urea and TMAO

To explain the  $\alpha$ -synuclein hydration of the systems containing urea and TMAO, the average number of water and osmolyte molecules within first the hydration shell (i.e., 0.5 nm of the protein surface) was calculated at 300 K (Table 2). A fraction of the average number of water and osmolyte molecules was also calculated. In urea, a significant

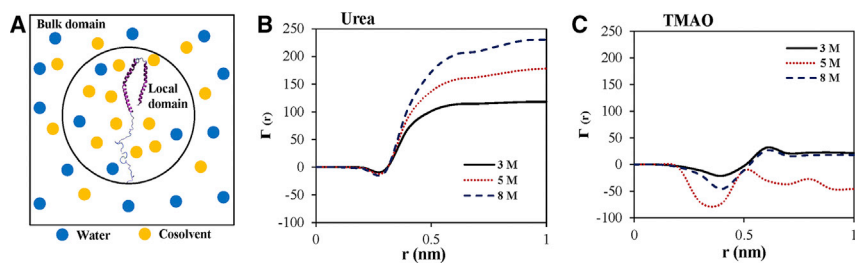

FIGURE 6 (A) Schematic illustration of the local and bulk domain of the protein. (B) The preferential interaction coefficient of urea and (C) TMAO with protein as a function of the distance “r” from the surface of the protein (local domain) is shown. To see this figure in color, go online.

**TABLE 2** Number of Water and Osmolyte Molecules Found within the 0.5 nm of  $\alpha$ -Synuclein Surface for All the Systems—Synuclein-Water, Synuclein-Urea (3, 5, and 8 M), and Synuclein-TMAO (3, 5, and 8 M)

| Solvent + Osmolytes | Number of Osmolytes( $N_o$ ) | Number of Water ( $N_w$ ) | $N_w/N_o$      |
|---------------------|------------------------------|---------------------------|----------------|
| Water               | 0                            | 2497                      | Not applicable |
| Water + Urea 3 M    | 155                          | 968                       | 6.2            |
| Water + Urea 5 M    | 240                          | 836                       | 3.5            |
| Water + Urea 8 M    | 351                          | 722                       | 2.1            |
| Water + TMAO 3 M    | 129                          | 1115                      | 8.6            |
| Water + TMAO 5 M    | 104                          | 1411                      | 13.6           |
| Water + TMAO 8 M    | 112                          | 1290                      | 11.5           |

decrease in the number of water molecules is observed in comparison with  $\alpha$ -synuclein-water simulation in which the average number of water molecule is 2497 in the first hydration shell. This decrease in the number of water molecules shows that urea molecules preferentially bind to the protein, leading to the exclusion of water molecules from the protein surface. A decrease in the number of water molecules from 2497 to smaller values in the case of TMAO at various concentrations was also observed, but this decrease is smaller than in the case of urea. This indicates that a lesser number of TMAO molecules can bind to the protein surface, resulting in a water to TMAO ratio of 8.6, 13.6, and 11.5 at 3, 5, and 8 M TMAO, respectively, whereas in the case of urea, the water to urea ratio was found to be 6.2, 3.5, and 2.1 at 3, 5, and 8 M urea, respectively. The results obtained here indicate that urea shows an enhanced interaction with the protein surface than TMAO. The dehydration pattern of  $\alpha$ -synuclein protein can be clearly seen by the  $N_w/N_o$  ratio of Table 2, which indicates prominent protein dehydration in the case of urea and moderate protein dehydration in the case of TMAO. The dehydration pattern can also be seen from Fig. S2, in which the number of water molecules in the first hydration shell is found to be larger in TMAO than in the case of urea. This shows that urea molecules have a high tendency to bind more closely to the protein surface compared to TMAO. A similar type of peptide dehydration was also observed by Sarma and Paul (62) in the case of the S-peptide analog, in which the ratio of  $N_w/N_u$  is found to be smaller than  $N_w/N_t$ , which shows greater peptide dehydration in the presence of urea compared to TMAO.

### Hydrogen bond analysis

The interaction mechanism of urea and TMAO with  $\alpha$ -synuclein can also be determined by calculating the number of hydrogen bonds formed between the protein side chain with the water molecules at different temperatures in the absence of osmolytes and with osmolytes at 300 K at various concentrations. We have also calculated the interaction energy between the protein and osmolytes at various concentrations at 300 K.

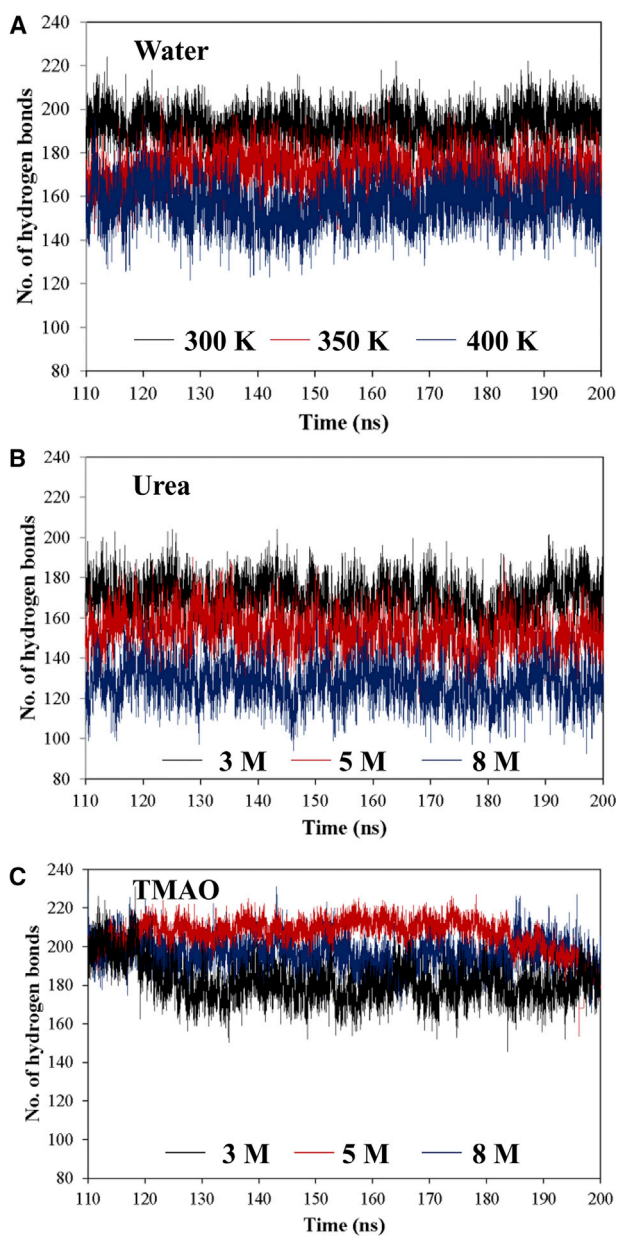

**FIGURE 7** Number of hydrogen bonds formed between the side chain of  $\alpha$ -synuclein with water (A) in water at 300, 350, and 400 K, (B) in urea (3, 5, and 8 M), and (C) in TMAO (3, 5, and 8 M) at 300 K. To see this figure in color, go online.

In the absence of osmolytes, the number of hydrogen bonds between the side chain and water were calculated at 300, 350, and 400 K (Fig. 7). It was observed that the number of hydrogen bonds between the side chain and water decreases with an increase in temperature over the course of the simulation time. The formation of more and more anti-parallel  $\beta$ -sheets takes place with an increase in temperature as the antiparallel alignment is energetically more favorable because of the perfect alignment of hydrophilic and hydrophobic amino acid residues. Because of this, the number of hydrogen bonds formed between the water and side chain of



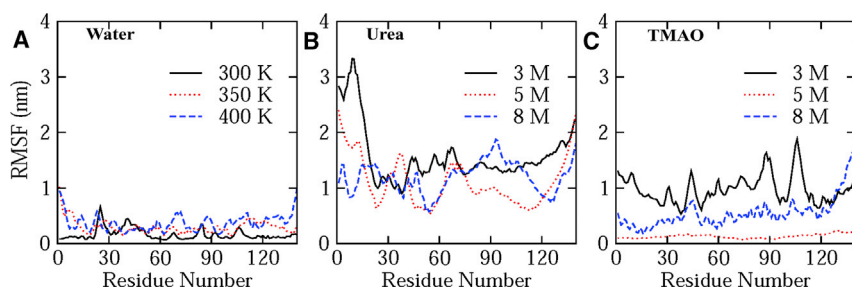

FIGURE 8 RMSFs of  $C\alpha$  atoms of each residue of  $\alpha$ -synuclein averaged over last 90 ns in (A) water (300, 350, and 400 K), (B) urea (3, 5, and 8 M), and (C) TMAO (3, 5, and 8 M). To see this figure in color, go online.

the protein decreases, which is in good agreement with the FEL results.

Urea molecules tend to interact more preferentially with the side chain of  $\alpha$ -synuclein because the protein side chain forms more energetically favorable bonds with the nearby urea molecules instead of finding a corresponding amino acid residue of the protein (61). This results in the decreased number of hydrogen bonds between the side chains of  $\alpha$ -synuclein with the water molecule in the presence of urea at various concentrations (Fig. 7 B), which leads to the extended conformation of the protein. The number of hydrogen bonds between the side chain of the protein with urea was also calculated (Fig. S3), and it was observed that number of hydrogen bonds increases with an increase in the concentration of urea. However, the mechanism of the interaction of TMAO with the protein side chain is entirely different from urea. The TMAO molecule did not interact much with the side chain of the protein (Fig. S3). This lesser number of interactions of TMAO with the side chain of the protein may be due to entropically unfavorable interactions with the amide NH of the protein, as reported by Cho et al. (63). Hydrogen bonds formed between the water and side chain of  $\alpha$ -synuclein in the presence of TMAO shows nonmonotonous behavior and shows a larger number of hydrogen bonds at 5 M TMAO because at this concentration,  $\alpha$ -synuclein resists the change in its initial conformation (Fig. 7 C).

Further analysis of the change in the conformations of  $\alpha$ -synuclein was carried out at residue level by plotting root mean-square fluctuations (RMSF) of  $C\alpha$  atoms of  $\alpha$ -synuclein averaged over the last 90 ns of the simulation (Fig. 8). Experimentally, it has been known that the core re-

gion of  $\alpha$ -synuclein, which is involved in fibril formation, and aggregation is residues 61–95 (64) as it leads to the formation of cross  $\beta$ -structure (65). It can be seen from the RMSF plot that in water, along with experimentally known regions, there are some other regions that are also involved in aggregate formation, and this can also be confirmed from DSSP plots in water at various temperatures (Fig. S4).

With an increase in temperature, the formation of more aggregates takes place as confirmed from DSSP results; therefore, fluctuation in the residues of  $\alpha$ -synuclein is smaller in comparison with urea and TMAO. However, in urea, a larger fluctuation in RMSF is observed as an extended conformation is adopted by the protein. It can be seen that the residues that show more fluctuations are 5–27, 28–45, and 60–120 (Fig. 8 B). As urea leads to the formation of an extended structure (i.e., opening of  $\alpha$ -helix), hence, more fluctuation in the RMSF value of  $C\alpha$  atoms is seen in comparison with the formation of  $\beta$ -sheet in water (Fig. 8 A). The further addition of TMAO to the system decreases the flexibility of these regions in a concentration-dependent manner (Fig. 8 C). It can be seen that at 5 M TMAO concentration, very little fluctuation in the  $C\alpha$  atom of residues is observed (almost negligible) as at this concentration,  $\alpha$ -synuclein remains in its native conformation, which is explained earlier by DSSP results. Thus, TMAO stabilizes and prevents the  $\alpha$ -synuclein from forming the  $\beta$ -sheet in a concentration-dependent manner.

To explore the driving force of protein-osmolyte interactions, nonbonded interaction energy (i.e., both Lennard-Jones (LJ) and Coulomb (CB) energies) was calculated. To do this, we have calculated the interaction energy (E) of the protein with its local solvent located in the first solvation shell (FSS, defined based on the RDF 0.5 nm) (i.e., both with urea ( $E^{PU}$ ) and TMAO ( $E^{PT}$ )). Then, the difference upon unfolding (i.e.,  $\Delta E^{FSS}$ ) has been calculated, and the relative contribution of LJ and CB interactions has been examined (66). The calculation was done using Eqs. 7 and 8:

$$E^{FSS} = E^{PX} = E_{LJ}^{PX} + E_{CB}^{PX}, \quad (7)$$

$$\Delta E^{FSS} = E_{unfolded}^{FSS} - E_{folded}^{FSS}, \quad (8)$$

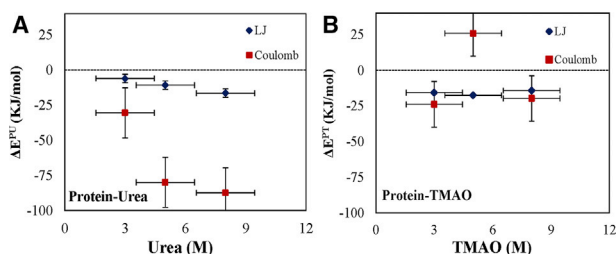

FIGURE 9 Changes in Lennard-Jones and Coulombic interaction energy along with the SD of the protein with (A) urea and (B) TMAO at different concentrations. To see this figure in color, go online.

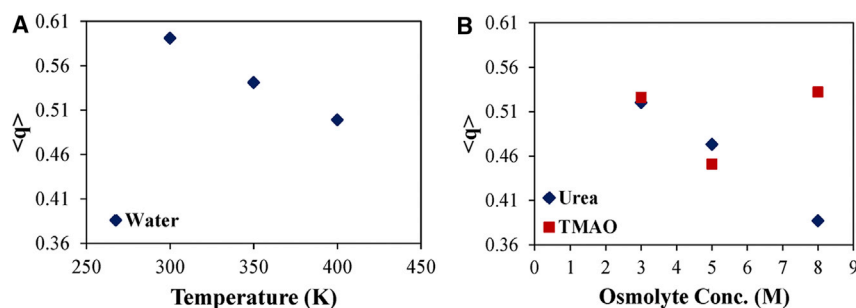

FIGURE 10 Average tetrahedral order parameter of bulk water molecules at (A) different temperatures (300, 350, and 400 K) in water and (B) 300 K in different osmolyte concentrations—urea (3, 5, and 8 M) and TMAO (3, 5, and 8 M), respectively. To see this figure in color, go online.

where folded and unfolded configurations are defined based on the probability distribution of  $C_{\alpha}$  RMSD (67) of the protein with a cutoff value of 1.11 nm, and X = urea (U) or TMAO (T), respectively.

It was observed that, at all concentrations of osmolytes, Coulombic interaction dominates the protein-osmolyte association more than the respective Lennard-Jones interaction. More negative is the value of interaction energy, greater will be the interaction of osmolytes with protein. In the case of urea, Coulomb and Lennard-Jones interaction energy increases with an increase in the concentration of urea (Fig. 9 A). However, in the case of TMAO, Coulombic interaction energy decreases with an increase in the concentration of TMAO, but this decrease is more at a 5 M TMAO concentration, and Lennard-Jones interaction energy is higher at this concentration, which shows the nonuniform behavior of TMAO and is in agreement with the above results (Fig. 9 B). It has also been known from the previous studies that the protecting/stabilizing osmolytes have less direct interaction with the proteins and increases the structural stability of the protein by accumulating in the hydrophobic regions of the proteins (39,68,69). The interaction between protein backbone and TMAO is highly unfavorable (70). It has also been confirmed from the energy results. However, in the case of urea, a strong Coulombic interaction with a protein can be a major reason for the denaturing effect. In urea, the Lennard-Jones interaction energy is higher than TMAO, which is the hallmark of urea, which causes the protein to be denatured by creating a hydrophobic environment, and this is also illustrated in earlier studies (71–73).

### Monitoring the structural and dynamic characteristic of water

Besides direct protein-osmolytes interaction, we also investigated the tendency of osmolytes (specifically, urea and TMAO) to interact with the water molecule and, in turn, modulate the structural and dynamical properties of water molecules. This change in water dynamics might influence the protein conformation.

The distribution of orientational tetrahedral order parameter ( $q$ ) for bulk water molecules at different temperatures

and at different concentrations of osmolytes (urea and TMAO) were calculated (Fig. 10). The value of “ $q$ ” goes on decreasing with an increase in temperature. The value of  $q$  is high at 300 K because at this temperature, water attains its maximal orientational order, and the hydrogen bond network is most structured at this temperature. The value of  $q$  for pure water is also calculated at 300 K, and its value is found to be 0.597, which is closer to the value obtained at 300 K in the presence of  $\alpha$ -synuclein, which shows that the ordered parameter of the water molecule is retained around aggregation-causing proteins (33). A further increase in the temperature leads to the compression of water molecules, which resulted in a decreased value of  $q$ . The “ $q$ ” value also decreases with an increase in the concentration of urea. This result is inconsistent with the prior experimental results obtained from the techniques such as Raman scattering, NMR (74,75), neutron diffraction (76–78), and many simulation studies (45) for the osmolytes-water system. Because TMAO is known as a protein-stabilizing osmolyte, it therefore has little impact on the hydrogen bonding network of water molecules as compared with other osmolytes (17). The tetrahedral order parameter of water in the case of TMAO first decreases from 0.526 to 0.451 at 3 and 5 M concentration and then increases to 0.532 at 8 M TMAO concentration, which shows the nonuniform behavior of TMAO at 5 M concentration. At 5 M TMAO concentration, the number of hydrogen bonds formed by side chain water is larger than that at any other concentration (Fig. 7 C); therefore, the  $q$  value at this concentration decreases as TMAO prefers to interact with water molecules rather than the protein side chain (70), and  $\alpha$ -synuclein remains in its native state at 5 M TMAO, which is in good agreement with the above results. Several studies suggest that TMAO can stabilize the folded state of the protein indirectly by enhancing the bulk water structure around the protein. As reported earlier, TMAO stabilizes the protein by strengthening the protein-water interaction (17,79–81). Even after so many studies, the exact mechanism of action of TMAO on protein stability and on solvent structure remains controversial. The perturbation in the  $q$  value is slightly higher in the case of urea because urea leads to a complete unfolding of  $\alpha$ -synuclein. This result is in agreement with the previously known result in which perturbation

**TABLE 3** Diffusion Coefficient of Water Molecules at Different Temperatures in the Absence of Osmolytes

| Temperature (K) | Diffusion Coefficient of Water ( $\text{cm}^2 \text{s}^{-1}$ ) $\times 10^{-5}$ |
|-----------------|---------------------------------------------------------------------------------|
| 300             | 4.351                                                                           |
| 350             | 8.610                                                                           |
| 400             | 15.423                                                                          |

in the  $q$  value of water molecules is slightly higher in the case of the unfolded system (60).

The effect of the temperature and osmolytes (urea and TMAO) on the surrounding matrix and the diffusion coefficient of water at 300, 350, and 400 K in the absence of osmolytes (Table 3) and of water and osmolytes (urea and TMAO) at 300 K were calculated (Table 4). The diffusion coefficient of water in the absence of osmolytes is  $4.351 \times 10^{-5} \text{cm}^2 \text{s}^{-1}$  at 300 K, which is in good agreement with the data obtained from NMR experiments (82).

The value of the diffusion coefficient increases with the increasing temperature in the absence of osmolytes (Table 3). However, at 300 K, there is significant slowing down of water dynamics in the presence of urea and TMAO at various concentrations as observed from the diffusion coefficient calculations (Table 4). Retardation in dynamics of osmolytes (urea and TMAO) also occurs, and it is higher than those of water. The average number of the hydrogen bond formed between water and osmolytes is found to be increasing with an increase in the concentration of osmolytes (Fig. S5). The variation of diffusivity with the concentration could be explained in terms of bulk viscosity, number of hydrogen bonds between water and osmolytes, and the accumulation of osmolytes around the protein. It is known from the experiments that the diffusivity of the water molecule is slowed down with an increase in osmolyte (urea and TMAO) concentration. Mostly, the rate of the diffusion of the water molecule is the same as that of osmolytes because of the formation of a stronger hydrogen bond between water and osmolytes (83). In the case of TMAO, the observed concentration-dependent diffusivity of the water molecule might be because of the bulk liquid viscosity (83). However, at the lowest diffusivity at 5 M TMAO, a nonmonotonous behavior can be explained in terms of the largest number of the hydrogen bond formed between TMAO and water. Because of a strong interaction between water and TMAO, retardation in the dynamics of the water molecule is more at this concentration than at any other concentration. With a further increase in the TMAO concentration, the diffusion of the water molecule increases as the accumulation of the TMAO molecule around the protein is observed (32) (Fig. 5 C), and also, the number of the hydrogen bonds between water and TMAO decreases (Fig. S5 B), which supports the above results. Contrary to the experimental decrease of the diffusion coefficient at lower concentrations, we observed an increase in the diffusion coefficient value at a significantly higher 8 M concentration.

**TABLE 4** Diffusion Coefficient of Water and Osmolytes (i.e., Urea and TMAO) at Various Concentrations at 300 K

| Osmolytes Concentration (M) | Diffusion Coefficient of Water ( $\text{cm}^2 \text{s}^{-1}$ ) $\times 10^{-5}$ | Diffusion Coefficient of Osmolytes ( $\text{cm}^2 \text{s}^{-1}$ ) $\times 10^{-5}$ |
|-----------------------------|---------------------------------------------------------------------------------|-------------------------------------------------------------------------------------|
| Urea 3 M                    | 3.762                                                                           | 1.913                                                                               |
| Urea 5 M                    | 3.516                                                                           | 1.853                                                                               |
| Urea 8 M                    | 3.190                                                                           | 1.597                                                                               |
| TMAO 3 M                    | 2.041                                                                           | 0.778                                                                               |
| TMAO 5 M                    | 0.010                                                                           | 0.001                                                                               |
| TMAO 8 M                    | 2.323                                                                           | 0.904                                                                               |

## CONCLUSION

In this study, we have explored the behavior of  $\alpha$ -synuclein in the presence of urea and TMAO at different concentrations. A remarkably distinct conformation of  $\alpha$ -synuclein was observed in the presence of both osmolytes. PD linked  $\alpha$ -synuclein, which is an intrinsically disordered protein, adopted an extended and compact conformation in the presence of urea and TMAO, respectively. The formation of  $\alpha$ -synuclein aggregates and insoluble fibrils linked to PD may be prevented in the presence of urea and TMAO. The unfolding pathway of  $\alpha$ -synuclein remains invariant of urea, which is confirmed from the PCA together with FEL analysis that shows the direction of motion of the protein. The stabilizing nature of TMAO is observed in a concentration-dependent manner. A resistance of change in the native conformation of  $\alpha$ -synuclein is observed at moderate concentrations in the presence of TMAO. Urea leads to an extended conformation of protein by directly interacting with the side chain of  $\alpha$ -synuclein, whereas TMAO itself does not interact much with the  $\alpha$ -synuclein and stabilizes the  $\alpha$ -synuclein by preferentially distributing the water molecules around the protein surface as observed from hydrogen bond analysis. The hydration behavior of  $\alpha$ -synuclein was also studied, and it was observed that urea displaces the water molecule from the surface of protein, whereas displacement of the water molecule from the surface of protein is lesser in the case of TMAO. This study could provide a detailed role of osmolytes (i.e., urea and TMAO) on the conformation behavior of  $\alpha$ -synuclein and gives a better understanding of the aggregation behavior of  $\alpha$ -synuclein, which is associated with PD.

## SUPPORTING MATERIAL

Supporting Material can be found online at <https://doi.org/10.1016/j.bpj.2019.09.046>.

## AUTHOR CONTRIBUTIONS

I.J. and S.M.N. designed the experiments. I.J. performed the analysis. S.M.N. analyzed the data. Both the authors contributed to the writing of the manuscript.

## ACKNOWLEDGMENTS

We acknowledge the support provided by the Bioinformatics Resources and Applications Facility at Centre for Development of Advanced Computing, Pune, India, for providing the supercomputer facility in carrying out MD simulations. We are also thankful to Department of Science and Technology, India for providing financial support via INSPIRE Fellowship and DRS-II SAP, DST-FIST, and DST-PURSE to the Department of Chemistry Aligarh Muslim University in carrying out the above research work.

## REFERENCES

- Maroteaux, L., J. T. Campanelli, and R. H. Scheller. 1988. Synuclein: a neuron-specific protein localized to the nucleus and presynaptic nerve terminal. *J. Neurosci.* 8:2804–2815.
- Jakes, R., M. G. Spillantini, and M. Goedert. 1994. Identification of two distinct synucleins from human brain. *FEBS Lett.* 345:27–32.
- Iwai, A., E. Masliah, ..., T. Saitoh. 1995. The precursor protein of non-A beta component of Alzheimer's disease amyloid is a presynaptic protein of the central nervous system. *Neuron.* 14:467–475.
- Spillantini, M. G., M. L. Schmidt, ..., M. Goedert. 1997. Alpha-synuclein in Lewy bodies. *Nature.* 388:839–840.
- Uéda, K., H. Fukushima, ..., T. Saitoh. 1993. Molecular cloning of cDNA encoding an unrecognized component of amyloid in Alzheimer disease. *Proc. Natl. Acad. Sci. USA.* 90:11282–11286.
- Conway, K. A., J. D. Harper, and P. T. Lansbury. 1998. Accelerated in vitro fibril formation by a mutant alpha-synuclein linked to early-onset Parkinson disease. *Nat. Med.* 4:1318–1320.
- Conway, K. A., S. J. Lee, ..., P. T. Lansbury, Jr. 2000. Acceleration of oligomerization, not fibrillization, is a shared property of both alpha-synuclein mutations linked to early-onset Parkinson's disease: implications for pathogenesis and therapy. *Proc. Natl. Acad. Sci. USA.* 97:571–576.
- Narhi, L., S. J. Wood, ..., M. Citron. 1999. Both familial Parkinson's disease mutations accelerate  $\alpha$ -synuclein aggregation. *J. Biol. Chem.* 274:9843–9846.
- Li, J., V. N. Uversky, and A. L. Fink. 2001. Effect of familial Parkinson's disease point mutations A30P and A53T on the structural properties, aggregation, and fibrillation of human alpha-synuclein. *Biochemistry.* 40:11604–11613.
- Crowther, R. A., R. Jakes, ..., M. Goedert. 1998. Synthetic filaments assembled from C-terminally truncated  $\alpha$ -synuclein. *FEBS Lett.* 436:309–312.
- Giasson, B. I., K. Uryu, ..., V. M. Lee. 1999. Mutant and wild type human alpha-synucleins assemble into elongated filaments with distinct morphologies in vitro. *J. Biol. Chem.* 274:7619–7622.
- Bendor, J. T., T. P. Logan, and R. H. Edwards. 2013. The function of  $\alpha$ -synuclein. *Neuron.* 79:1044–1066.
- Zhou, H. X., G. Rivas, and A. P. Minton. 2008. Macromolecular crowding and confinement: biochemical, biophysical, and potential physiological consequences. *Annu. Rev. Biophys.* 37:375–397.
- Harries, D., and J. Rösgen. 2008. A practical guide on how osmolytes modulate macromolecular properties. *Methods Cell Biol.* 84:679–735.
- Rani, A., and P. Venkatesu. 2018. Correction: changing relations between proteins and osmolytes: a choice of nature. *Phys. Chem. Chem. Phys.* 20:23151.
- Gordon, J. A., and W. P. Jencks. 1963. The relationship of structure to the effectiveness of denaturing agents for proteins. *Biochemistry.* 2:47–57.
- Zou, Q., B. J. Bennion, ..., K. P. Murphy. 2002. The molecular mechanism of stabilization of proteins by TMAO and its ability to counteract the effects of urea. *J. Am. Chem. Soc.* 124:1192–1202.
- Kokubo, H., C. Y. Hu, and B. M. Pettitt. 2011. Peptide conformational preferences in osmolyte solutions: transfer free energies of decaalanine. *J. Am. Chem. Soc.* 133:1849–1858.
- Mondal, J., G. Stirnemann, and B. J. Berne. 2013. When does trimethylamine N-oxide fold a polymer chain and urea unfold it? *J. Phys. Chem. B.* 117:8723–8732.
- Levine, Z. A., L. Larini, ..., J. E. Shea. 2015. Regulation and aggregation of intrinsically disordered peptides. *Proc. Natl. Acad. Sci. USA.* 112:2758–2763.
- Moore, D. J., A. B. West, ..., T. M. Dawson. 2005. Molecular pathophysiology of Parkinson's disease. *Annu. Rev. Neurosci.* 28:57–87.
- Van Der Spoel, D., E. Lindahl, ..., H. J. Berendsen. 2005. GROMACS: fast, flexible, and free. *J. Comput. Chem.* 26:1701–1718.
- Berendsen, H. J. C., J. P. M. Postma, ..., J. Hermans. 2003. Interaction models for water in relation to protein hydration. In *Intermolecular Forces*. B. Pullman, ed. Springer, pp. 331–342.
- Rocco, A. G., L. Mollica, ..., I. Eberini. 2008. Characterization of the protein unfolding processes induced by urea and temperature. *Biophys. J.* 94:2241–2251.
- Malde, A. K., L. Zuo, ..., A. E. Mark. 2011. An automated force field topology builder (ATB) and repository: version 1.0. *J. Chem. Theory Comput.* 7:4026–4037.
- Dalal, S., A. Mhashal, ..., S. M. Gaikwad. 2017. Functional stability and structural transitions of Kallikrein: spectroscopic and molecular dynamics studies. *J. Biomol. Struct. Dyn.* 35:330–342.
- dos Santos, E. S., D. H. S. Gritta, and J. S. de Almeida. 2015. Analysis of interactions between potent inhibitors of ATP sulfurylase via molecular dynamics. *Mol. Simul.* 42:605–610.
- Hajnic, M., J. I. Osorio, and B. Zagrovic. 2015. Interaction preferences between nucleobase mimetics and amino acids in aqueous solutions. *Phys. Chem. Chem. Phys.* 17:21414–21422.
- Plazinski, W., A. Plazinska, and M. Drach. 2016. Acyclic forms of aldohexoses and ketohexoses in aqueous and DMSO solutions: conformational features studied using molecular dynamics simulations. *Phys. Chem. Chem. Phys.* 18:9626–9635.
- Wei, Y., H. Wang, ..., S. Yuan. 2016. A molecular dynamics study on two promising green surfactant micelles of choline dodecyl sulfate and laurate. *RSC Adv.* 6:84090–84097.
- Qu, G., C. Xue, ..., W. Ding. 2016. Molecular dynamics simulation of sulfobetaine-type zwitterionic surfactants at the decane/water interface: structure, interfacial properties. *J. Dispersion Sci. Technol.* 37:1710–1717.
- Markthaler, D., J. Zeman, ..., N. Hansen. 2017. Validation of trimethylamine-N-oxide (TMAO) force fields based on thermophysical properties of aqueous TMAO solutions. *J. Phys. Chem. B.* 121:10674–10688.
- Jahan, I., and S. M. Nayeem. 2018. Effect of urea, arginine, and ethanol concentration on aggregation of  $^{179}\text{CVNITV}_{184}$  fragment of sheep prion protein. *ACS Omega.* 3:11727–11741.
- Kabsch, W., and C. Sander. 1983. Dictionary of protein secondary structure: pattern recognition of hydrogen-bonded and geometrical features. *Biopolymers.* 22:2577–2637.
- Humphrey, W., A. Dalke, and K. Schulten. 1996. VMD: visual molecular dynamics. *J. Mol. Graph.* 14:33–38, 27–28.
- Amadei, A., A. B. Linssen, and H. J. Berendsen. 1993. Essential dynamics of proteins. *Proteins.* 17:412–425.
- Amadei, A., M. A. Ceruso, and A. Di Nola. 1999. On the convergence of the conformational coordinates basis set obtained by the essential dynamics analysis of proteins' molecular dynamics simulations. *Proteins.* 36:419–424.
- Timasheff, S. N. 1998. Control of protein stability and reactions by weakly interacting cosolvents: the simplicity of the complicated. *Adv. Protein Chem.* 51:355–432.
- Timasheff, S. N. 2002. Protein-solvent preferential interactions, protein hydration, and the modulation of biochemical reactions by solvent components. *Proc. Natl. Acad. Sci. USA.* 99:9721–9726.
- John, G. K., and J. G. Richard. 1950. Light scattering arising from composition fluctuations in multi-component systems. *J. Chem. Phys.* 18:54–57.

41. Schellman, J. A. 1978. Solvent denaturation. *Biopolymers*. 17:1305–1322.
42. Timasheff, S. N. 1993. The control of protein stability and association by weak interactions with water: how do solvents affect these processes? *Annu. Rev. Biophys. Biomol. Struct.* 22:67–97.
43. Shukla, D., C. Shinde, and B. L. Trout. 2009. Molecular computations of preferential interaction coefficients of proteins. *J. Phys. Chem. B*. 113:12546–12554.
44. Sharma, R., A. Mudi, and C. Chakravarty. 2006. Diffusional anomaly and network dynamics in liquid silica. *J. Chem. Phys.* 125:44705.
45. Lee, S. L., P. G. Debenedetti, and J. R. Errington. 2005. A computational study of hydration, solution structure, and dynamics in dilute carbohydrate solutions. *J. Chem. Phys.* 122:204511.
46. Uversky, V. N., J. Li, and A. L. Fink. 2001. Evidence for a partially folded intermediate in  $\alpha$ -synuclein fibril formation. *J. Biol. Chem.* 276:10737–10744.
47. Ariesandi, W., C. F. Chang, ..., Y. R. Chen. 2013. Temperature-dependent structural changes of Parkinson's alpha-synuclein reveal the role of pre-existing oligomers in alpha-synuclein fibrillization. *PLoS One*. 8:e53487.
48. Apetri, M. M., N. C. Maiti, ..., V. E. Anderson. 2006. Secondary structure of  $\alpha$ -synuclein oligomers: characterization by raman and atomic force microscopy. *J. Mol. Biol.* 355:63–71.
49. Bartels, T., J. G. Choi, and D. J. Selkoe. 2011.  $\alpha$ -Synuclein occurs physiologically as a helically folded tetramer that resists aggregation. *Nature*. 477:107–110.
50. Wang, W., I. Perovic, ..., Q. Q. Hoang. 2011. A soluble  $\alpha$ -synuclein construct forms a dynamic tetramer. *Proc. Natl. Acad. Sci. USA*. 108:17797–17802.
51. Sandal, M., F. Valle, ..., B. Samorè. 2008. Conformational equilibria in monomeric  $\alpha$ -synuclein at the single-molecule level. *PLoS Biol.* 6:e6.
52. Frimpong, A. K., R. R. Abzalimov, ..., I. A. Kaltashov. 2010. Characterization of intrinsically disordered proteins with electrospray ionization mass spectrometry: conformational heterogeneity of  $\alpha$ -synuclein. *Proteins*. 78:714–722.
53. Chen, S. W., S. Drakulic, ..., N. Cremades. 2015. Structural characterization of toxic oligomers that are kinetically trapped during  $\alpha$ -synuclein fibril formation. *Proc. Natl. Acad. Sci. USA*. 112:E1994–E2003.
54. Dusa, A., J. Kaylor, ..., A. L. Fink. 2006. Characterization of oligomers during  $\alpha$ -synuclein aggregation using intrinsic tryptophan fluorescence. *Biochemistry*. 45:2752–2760.
55. Yu, H., W. Han, ..., K. Schulten. 2015. Transient  $\beta$ -hairpin formation in  $\alpha$ -synuclein monomer revealed by coarse-grained molecular dynamics simulation. *J. Chem. Phys.* 143:243142.
56. Liu, F. F., X. Y. Dong, and Y. Sun. 2008. Molecular mechanism for the effects of trehalose on beta-hairpin folding revealed by molecular dynamics simulation. *J. Mol. Graph. Model.* 27:421–429.
57. Kazmirski, S. L., A. Li, and V. Daggett. 1999. Analysis methods for comparison of multiple molecular dynamics trajectories: applications to protein unfolding pathways and denatured ensembles. *J. Mol. Biol.* 290:283–304.
58. Toofanny, R. D., A. L. Jonsson, and V. Daggett. 2010. A comprehensive multidimensional-embedded, one-dimensional reaction coordinate for protein unfolding/folding. *Biophys. J.* 98:2671–2681.
59. Ferreon, A. C., M. M. Moosa, ..., A. A. Deniz. 2012. Counteracting chemical chaperone effects on the single-molecule  $\alpha$ -synuclein structural landscape. *Proc. Natl. Acad. Sci. USA*. 109:17826–17831.
60. Katyal, N., and S. Deep. 2014. Revisiting the conundrum of trehalose stabilization. *Phys. Chem. Chem. Phys.* 16:26746–26761.
61. Canchi, D. R., and A. E. García. 2013. Cosolvent effects on protein stability. *Annu. Rev. Phys. Chem.* 64:273–293.
62. Sarma, R., and S. Paul. 2012. Association of small hydrophobic solute in presence of the osmolytes urea and trimethylamine-N-oxide. *J. Phys. Chem. B*. 116:2831–2841.
63. Cho, S. S., G. Reddy, ..., D. Thirumalai. 2011. Entropic stabilization of proteins by TMAO. *J. Phys. Chem. B*. 115:13401–13407.
64. Rajagopalan, S., and J. K. Andersen. 2001. Alpha synuclein aggregation: is it the toxic gain of function responsible for neurodegeneration in Parkinson's disease? *Mech. Ageing Dev.* 122:1499–1510.
65. Rodriguez, J. A., M. I. Ivanova, ..., D. S. Eisenberg. 2015. Structure of the toxic core of  $\alpha$ -synuclein from invisible crystals. *Nature*. 525:486–490.
66. Canchi, D. R., D. Paschek, and A. E. García. 2010. Equilibrium study of protein denaturation by urea. *J. Am. Chem. Soc.* 132:2338–2344.
67. Paschek, D., S. Hempel, and A. E. García. 2008. Computing the stability diagram of the Trp-cage miniprotein. *Proc. Natl. Acad. Sci. USA*. 105:17754–17759.
68. Zhang, N., F. F. Liu, ..., Y. Sun. 2012. Molecular insight into the counteraction of trehalose on urea-induced protein denaturation using molecular dynamics simulation. *J. Phys. Chem. B*. 116:7040–7047.
69. Paul, S., and S. Paul. 2015. Exploring the counteracting mechanism of trehalose on urea conferred protein denaturation: a molecular dynamics simulation study. *J. Phys. Chem. B*. 119:9820–9834.
70. Auton, M., and D. W. Bolen. 2004. Additive transfer free energies of the peptide backbone unit that are independent of the model compound and the choice of concentration scale. *Biochemistry*. 43:1329–1342.
71. Ikeguchi, M., S. Nakamura, and K. Shimizu. 2001. Molecular dynamics study on hydrophobic effects in aqueous urea solutions. *J. Am. Chem. Soc.* 123:677–682.
72. Bennion, B. J., and V. Daggett. 2003. The molecular basis for the chemical denaturation of proteins by urea. *Proc. Natl. Acad. Sci. USA*. 100:5142–5147.
73. Paul, S., and S. Paul. 2015. Investigating the counteracting effect of trehalose on urea-induced protein denaturation using molecular dynamics simulation. *J. Phys. Chem. B*. 119:10975–10988.
74. Branca, C., S. Magazu, ..., P. Migliardo. 1999. Anomalous cryoprotective effectiveness of trehalose: Raman scattering evidences. *J. Chem. Phys.* 111:281–287.
75. Branca, C., S. Magazu, ..., E. Tettamanti. 1999. On the bioprotective effectiveness of trehalose: ultrasonic technique, Raman scattering and NMR investigations. *J. Mol. Struct.* 480–481:133–140.
76. Branca, C., S. Magazu, ..., P. Migliardo. 2002. Destructuring effect of trehalose on the tetrahedral network of water: a Raman and neutron diffraction comparison. *Physica A Stat. Mech. Appl.* 304:314–318.
77. Branca, C., S. Magazu, ..., D. Colognesi. 2002. Neutron-scattering study of the vibrational behavior of trehalose aqueous solutions. *Appl. Phys., A Mater. Sci. Process.* 74:s452.
78. Branca, C., G. Maisano, ..., A. K. Soper. 2002. Study on destructuring effect of trehalose on water by neutron diffraction. *Appl. Phys., A Mater. Sci. Process.* 74 (Suppl):s450–s451.
79. Wei, H., Y. Fan, and Y. Q. Gao. 2010. Effects of urea, tetramethyl urea, and trimethylamine N-oxide on aqueous solution structure and solvation of protein backbones: a molecular dynamics simulation study. *J. Phys. Chem. B*. 114:557–568.
80. Pazos, I. M., and F. Gai. 2012. Solute's perspective on how trimethylamine oxide, urea, and guanidine hydrochloride affect water's hydrogen bonding ability. *J. Phys. Chem. B*. 116:12473–12478.
81. Ma, J., I. M. Pazos, and F. Gai. 2014. Microscopic insights into the protein-stabilizing effect of trimethylamine N-oxide (TMAO). *Proc. Natl. Acad. Sci. USA*. 111:8476–8481.
82. Rampp, M., C. Buttersack, and H. D. Lüdemann. 2000. c,T-dependence of the viscosity and the self-diffusion coefficients in some aqueous carbohydrate solutions. *Carbohydr. Res.* 328:561–572.
83. Teng, X., Q. Huang, ..., T. Ichiye. 2018. Diffusion of aqueous solutions of ionic, zwitterionic, and polar solutes. *J. Chem. Phys.* 148:222827.

**Biophysical Journal, Volume 117**

**Supplemental Information**

**Effect of Osmolytes on Conformational Behavior of Intrinsically Disordered Protein  $\alpha$ -Synuclein**

**Ishrat Jahan and Shahid M. Nayeem**

## SUPPORTING MATERIAL

### **Effect of osmolytes on conformational behaviour of intrinsically disordered protein $\alpha$ -synuclein**

**Authors name and affiliation:** Ishrat Jahan

Department of chemistry, Aligarh Muslim University,

Aligarh-202002, U.P., India

**Email:** [jishrat17@gmail.com](mailto:jishrat17@gmail.com)

**Corresponding Author:** Shahid M. Nayeem\*,

Associate Professor

Department of Chemistry, Aligarh Muslim University,

Aligarh-202002, U.P, India

**Mobile:** +91-9412527078

**Email:** [msnayeem.ch@amu.ac.in](mailto:msnayeem.ch@amu.ac.in)

### **Validation of force field generated from ATB**

In order to validate the force field generated from ATB, we have calculated the thermodynamic property (i.e. Density), transport property (self-diffusion coefficient) and structural property (RDF and number of hydrogen bonds) of 3 M TMAO box and compared our result with the Shea force field and United atom (UA) ff (generated from ATB) of TMAO (1). We found that the density of TMAO solution in our case at 3 M TMAO is  $980.24 \text{ Kg/m}^3$ , for UA model it is  $980 \text{ Kg/m}^3$  for solution of concentration up to 4 molal and in case of Shea model it is  $990 \text{ Kg/m}^3$  for TMAO solution of molality  $< 2 \text{ mol/Kg}$  (1). The ratio of self-diffusion coefficient of water in TMAO water solution to the self-diffusion coefficient of pure water in our case is found to be 0.808, in UA model it is 0.7 and for Shea model it is  $0.58 (3.5 \text{ m}) \times 10^{-9} \text{ m}^2/\text{s}$ . The number of hydrogen bond per TMAO molecule is 2.13 (3 M TMAO), for UA model it is  $< 2.5$  and for Shea model it is  $< 3$  ( $\sim 2.8$ ) for  $\sim 4 \text{ mol/Kg}$  solution.

The small variations in the physical constant values could be attributed to the small difference in concentrations. RDF of NT-NT is also calculated and the plot obtained in our case shows similar pattern as shown by UA model (1).

#### The RDF plot of NT-NT and NT-OW

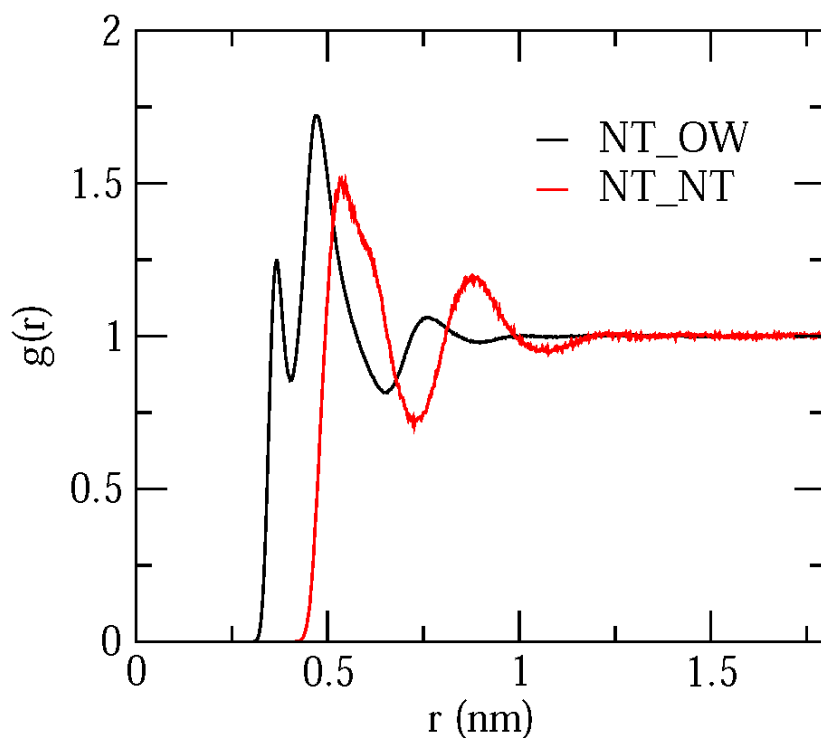

The thermodynamic properties of UA model shows similarity with the Shea model. However the deviation from the experimental data could be explained in terms of weak solute-water interactions, a consequence of non-optimal assignment of interaction parameter (1).

**Table S1:** No. of clusters formed and cluster entropy ( $S = K \ln W$ ) in bracket at various RMSD in different conditions. (*Convergence check has been monitored by calculating the number of clusters and cluster entropy during the time interval of 50 ns at various RMSD and it is found that the number of clusters and cluster entropy decreases at the end of the simulation. Since equilibration time for different trajectory is found to be different so we tried to find out a common equilibrated segment from this trajectory as shown in the table below. The number of clusters is 1 for simulation time of 110 ns to 200 ns in all the trajectories except those of urea, which may be because of greater degree of unfolding taking place in urea. It is for this reason that the analysis segment is for the last 90 ns.*)

|                    |
|--------------------|
| Number of Clusters |
|--------------------|



|                 | <b>0-50 ns</b> | <b>50- 100 ns</b> | <b>100-150 ns</b> | <b>150-200 ns</b> |
|-----------------|----------------|-------------------|-------------------|-------------------|
| <b>300 K</b>    | 92 (4.52)      | 1(0)              | 1(0)              | 1(0)              |
| <b>350 K</b>    | 72(4.276)      | 5(1.61)           | 1(0)              | 1(0)              |
| <b>400 K</b>    | 14(2.64)       | 1(0)              | 1(0)              | 1(0)              |
| <b>Urea 3 M</b> | 9(2.19)        | 4(1.39)           | 9(2.19)           | 8(2.08)           |
| <b>Urea 5 M</b> | 19(2.94)       | 10(2.30)          | 11(2.39)          | 4(1.39)           |
| <b>Urea 8 M</b> | 21(3.04)       | 14(2.64)          | 26(3.26)          | 20(2.99)          |
| <b>TMAO 3 M</b> | 5(1.61)        | 3(1.09)           | 2(0.693)          | 1(0)              |
| <b>TMAO 5 M</b> | 1(0)           | 1(0)              | 1(0)              | 1(0)              |
| <b>TMAO 8 M</b> | 7(1.95)        | 5(1.61)           | 2(0.693)          | 1(0)              |

**Table S2:** Percentage of secondary structure content of  $\alpha$ -synuclein in presence of 5 M urea and 5 M TMAO at 300 K, 350 K and 400 K.

| <b>Temperature (K)</b> | <b>Urea 5 M</b>                  |                                 |             | <b>TMAO 5 M</b>                  |                                 |             |
|------------------------|----------------------------------|---------------------------------|-------------|----------------------------------|---------------------------------|-------------|
|                        | <b><math>\alpha</math>-Helix</b> | <b><math>\beta</math>-Sheet</b> | <b>Coil</b> | <b><math>\alpha</math>-Helix</b> | <b><math>\beta</math>-Sheet</b> | <b>Coil</b> |
| <b>300</b>             | 3                                | 1                               | 76          | 52                               | 0                               | 24          |
| <b>350</b>             | 0                                | 19                              | 61          | 5                                | 1                               | 45          |
| <b>400</b>             | 0                                | 23                              | 48          | 8                                | 1                               | 44          |

**Table S3:** Fraction of native contacts of C $\alpha$  atoms of  $\alpha$ -Synuclein

| <b>Water/Osmolyte</b> | <b>Average Fraction of native Contact</b> |
|-----------------------|-------------------------------------------|
| 300 K                 | 0.745017                                  |
| 350K                  | 0.65617                                   |
| 400K                  | 0.61497                                   |
| Urea 3 M              | 0.603184                                  |
| Urea 5 M              | 0.60223                                   |
| Urea 8 M              | 0.5915                                    |
| TMAO 3 M              | 0.642577                                  |
| TMAO 5 M              | 0.947012                                  |
| TMAO 8 M              | 0.793457                                  |

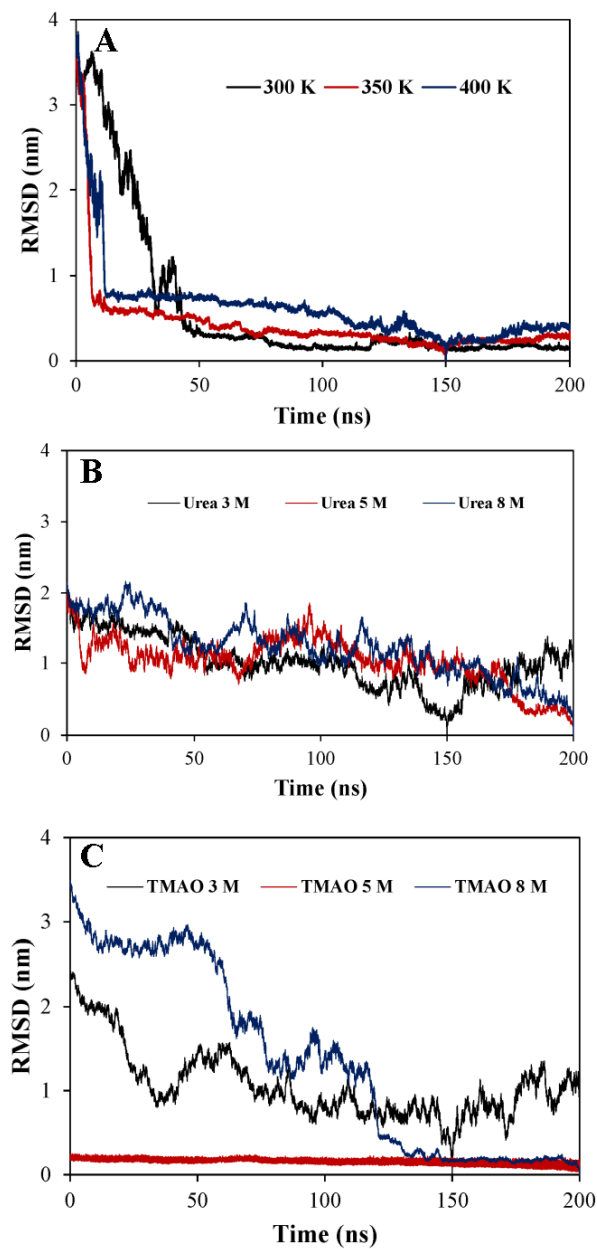

**Fig.S1:** RMSD of backbone atoms of  $\alpha$ -synuclein in water at different temperature and in osmolytes at various concentrations (large fluctuation in RMSD in case of osmolytes is due to large deviation in their conformation from the initial one).

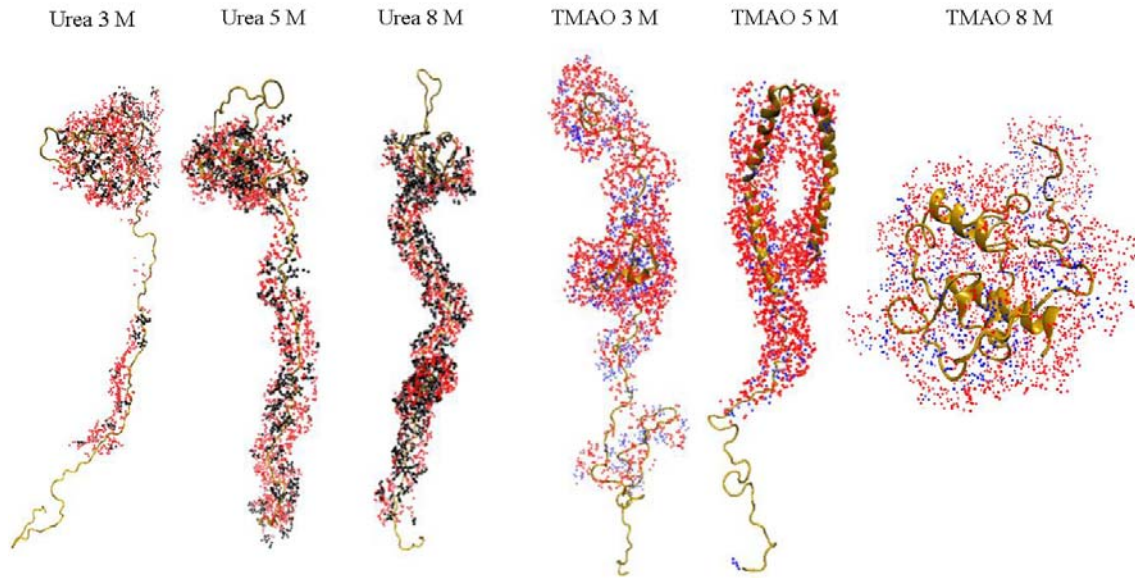

**Fig.S2:** Protein dehydration for systems containing urea and TMAO within 0.5 nm of  $\alpha$ -synuclein surface (black dots are for urea, blue for TMAO and red for water molecules).

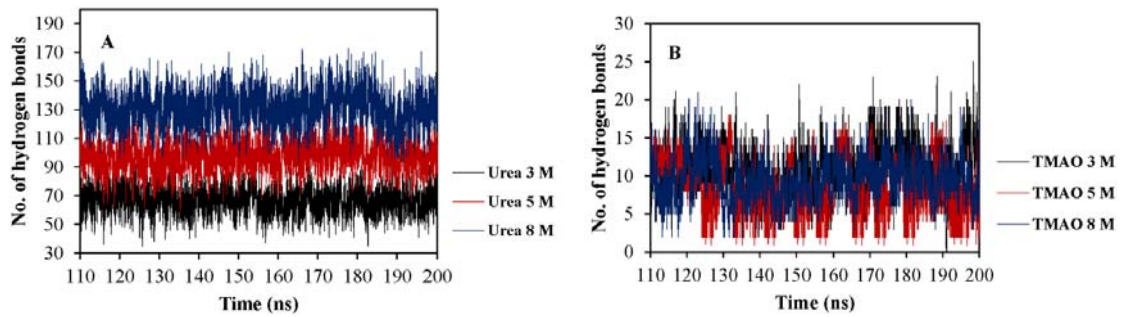

**Fig.S3:** Number of hydrogen bond formed between side chain of  $\alpha$ -Synuclein and osmolytes (A) urea (3 M, 5 M and 8 M) and (B) TMAO (3 M, 5 M and 8 M).

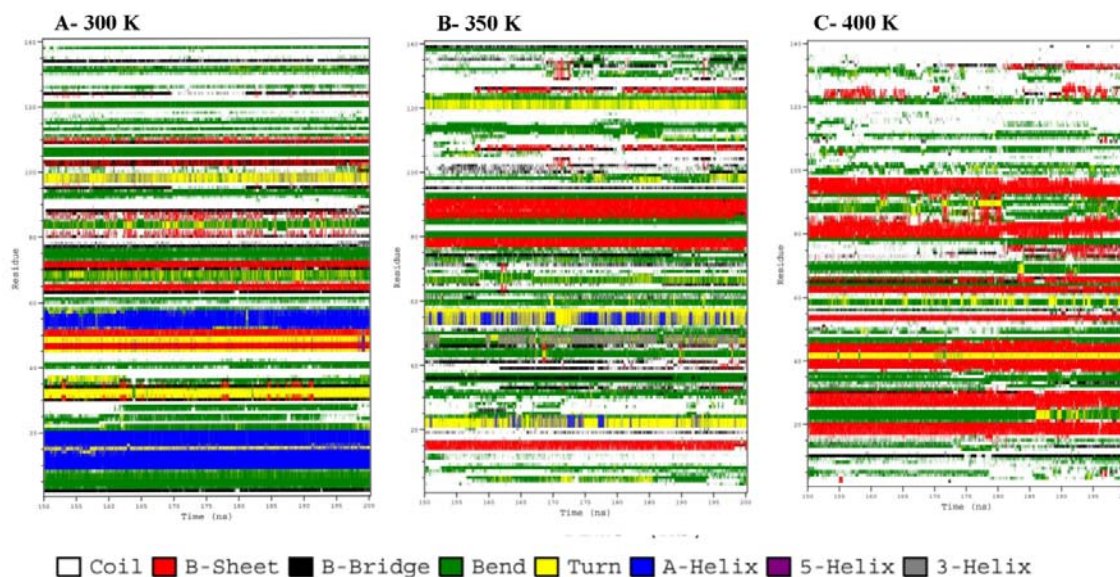

**Fig.S4:** Secondary Structure plot of  $\alpha$ -Synuclein in water at (A) 300 K, (B) 350 K and (C) 400 K.

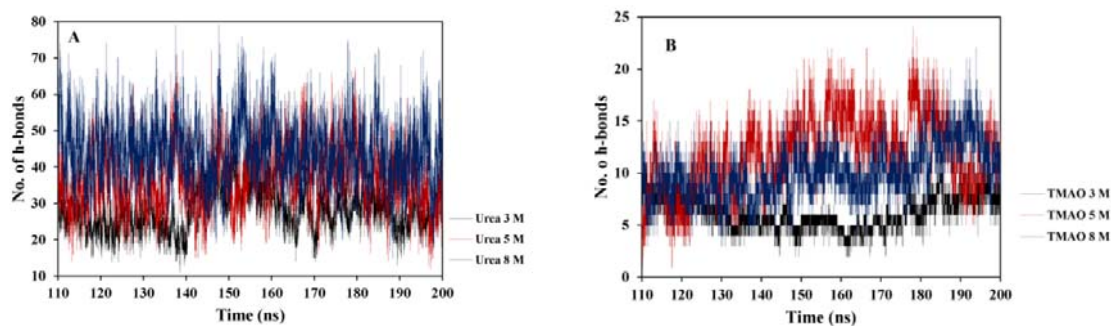

**Fig.S5:** Number of hydrogen bond formed between water and osmolytes in the first hydration shell (A) Urea (3 M, 5 M and 8 M), (B) TMAO (3 M, 5 M and 8 M)

## Supporting References

1. Markthaler, D., J. Zeman, J. Baz, J. Smiatek, and N. Hansen. 2017. Validation of Trimethylamine-N-oxide (TMAO) Force Fields Based on Thermophysical Properties of Aqueous TMAO Solutions. *The Journal of Physical Chemistry B* 121(47):10674-10688.
